# Supplementary material
Source: Elsevier journal article supplement (https://www.sciencedirect.com/science/article/pii/S0300289614000647)
Supplement: mmc2 [file S0300289614000647:mmc2.doc]

**Tabla 1S: Etiología del Nódulo Pulmonar Solitario**.

**Nódulos Malignos**

• Carcinoma pulmonar:

- Adenocarcinoma
- Epidermoide
- Carcinoma de células grandes
- Carcinoma de células pequeñas

• Carcinosarcoma

• Sarcoma pulmonar

• Melanoma pulmonar

• Hemangioendotelioma

• Plasmocitoma

• Carcinoide

• Linfoma pulmonar

• Metástasis pulmonar

**Nódulos benignos**

• Infecciones: tuberculosis, histoplasmosis, coccidiomicosis, sífilis, brucelosis, nocardia, micobacterias atípicas, pneumocystis

• Parásitos: Ascaris, Toxocara, Echinococcus, Dirofilaria, Paragonimus, Micetoma

• Neumonía redonda, absceso pulmonar

• Bronquiectasia rellena

• Neumonía organizada

• Lesiones congénitas: atresia bronquial, hipoplasia, malformación adenomatoidea, secuestro, quiste broncogénico.

• Patología vascular: malformación arteriovenosa, aneurisma o variz.

• Granulomatosis con poliangeítis (Wegener)

• Granuloma eosinófilo

• Sarcoidosis

• Nódulo reumatoide

• Tumor inflamatorio

• Silicoma y silicoantracoma

• Hamartoma

• Amiloidoma

• Tumores benignos: lipoma, leiomioma, quemodectoma, fibroma, condroma, hemangiopericitoma, hemangioma, papiloma, neurofibroma.

• Ganglio intrapulmonar

• Endometrioma

• Infarto pulmonar

• Atelectasia redonda

• Hematoma y contusión pulmonar

• Impacto mucoide

• Lesión fibrosa cicatricial

• Neumonía lipoidea

• Neumatocele o bulla rellenos

**Tabla 2S: Estimación de la probabilidad de malignidad del nódulo pulmonar**

**Modelos logísticos**:

- 1. **Modelo Álvarez. Hospital 12 Octubre (2000)**[**30**](#_ENREF_30)**: datos sobre radiografía**

*x = -11,885 + (0,229 * diámetro) + (2,349 * bordes) + (0,069 * edad)*

- 1. **Modelo Mayo Clinic (1997)**[**28**](#_ENREF_28)**: datos sobre radiografía o TC**

*x = -6.827 + (0.0391 * edad) + (0.7917 * tabaco) + (1.339 * cancer) + (0.127 * diámetro) + (1.0407 * espiculacion) + (0.784 * lóbulos superiores)*

Disponible en forma de calculadora vía web en (acceso en enero/2014): <http://reference.medscape.com/calculator/solitary-pulmonary-nodule-risk>

- 1. **Modelo Guyatt (2007)**[**34**](#_ENREF_34)**: Datos extraídos de TC**

*x = - 8.404 + (2.061 * tabaco) + (0.779 * (edad/10)) + (0.112 * diámetro) - (0.567 * (años sin fumar/10))*

- 1. **Modelo predictivo de la probabilidad de malignidad en NPS hallados en CT de cribado de cáncer de pulmón**[**7**](#_ENREF_7)**.**

|  | **OR (IC)** | **p** | **Coeficiente Beta** |
| --- | --- | --- | --- |
| **Sexo: mujer** | 1.91 (1.2–3.2) | 0.008 | 0.6467 |
| **Diámetro** |  | <0.001 | −5.5537 |
| **Lóbulos superiores** | 1.82 (1.1–2) | 0.02 | 0.6009 |
| **Espiculación** | 2.54 (1.5–4.4) | 0.001 | 0.9309 |
| **Constante** |  |  | −6.6144 |

Modelo reducido. En el modelo completo están también asociadas a malignidad la edad, la historia familiar de cáncer, enfisema en TC, carácter mixto del nódulo (parte vidrio y parte sólida) y menor número de nódulos en TC. Disponible en forma de calculadora vía web tras registrarse en (acceso en septiembre/2013): <http://www.brocku.ca/lung-cancer-risk-calculator>

e: (base del logaritmo natural) = 2,7182818. Edad en años. Tabaco: sí, 1; no, 0; cáncer previo: si, 1; no, 0. Diámetro: en mm. Espiculación o bordes mal definidos: si,1; no, 0. Lóbulos superiores: si está ahí localizado, 1; si está en otro lóbulo, 0. Años sin fumar en exfumadores; en fumadores activos y no fumadores vale 0. +: suma. -: resta. *: multiplica
